# Supplementary material for: Optimizing reaction conditions for the light-driven hydrogen evolution in a loop photoreactor
Source: publisher site journal article supplement (doi:10.3762/bjoc.20.9), 2024-01-16
Supplement: Additional file 1 [file 1860-5397-20-9-S1.pdf]

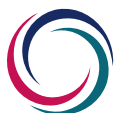

## Supporting Information

for

### Optimizing reaction conditions for the light-driven hydrogen evolution in a loop photoreactor

Pengcheng Li, Daniel Kowalczyk, Johannes Liessem, Mohamed M. Elnagar, Dariusz Mitoraj, Radim Beranek and Dirk Ziegenbalg

*Beilstein J. Org. Chem.* **2024**, *20*, 74–91. doi:10.3762/bjoc.20.9

**Details of technical drawings, technical specifications, adjustment factor calculation, and DOE table**

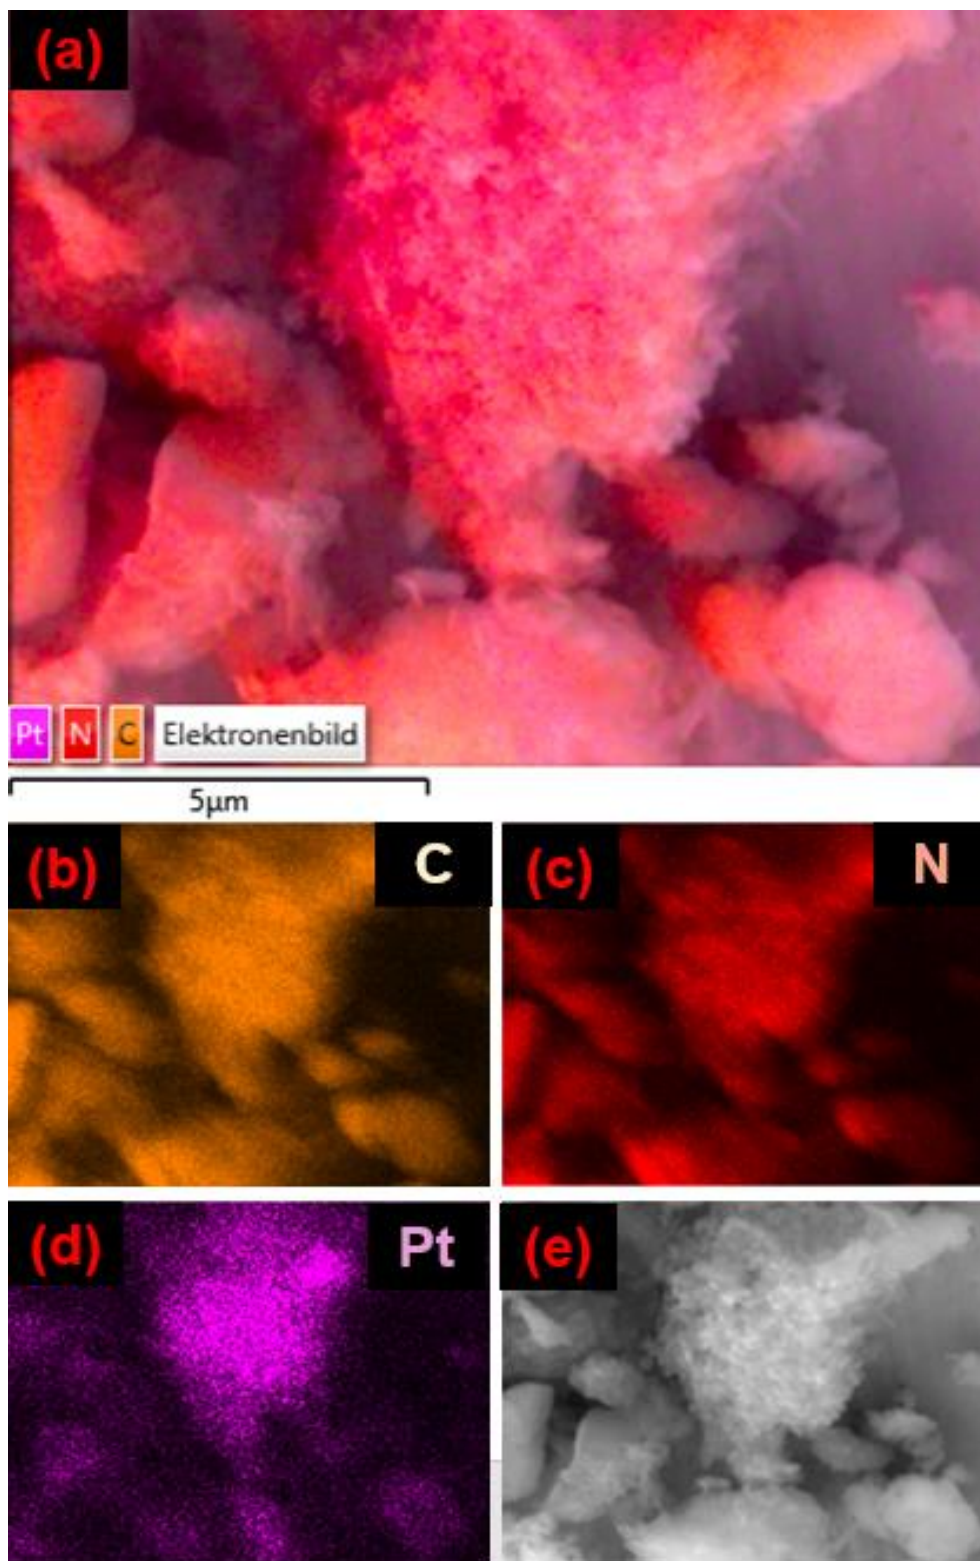

**Figure S1.** SEM-EDX elemental mapping images of C, N, and Pt on a particle.

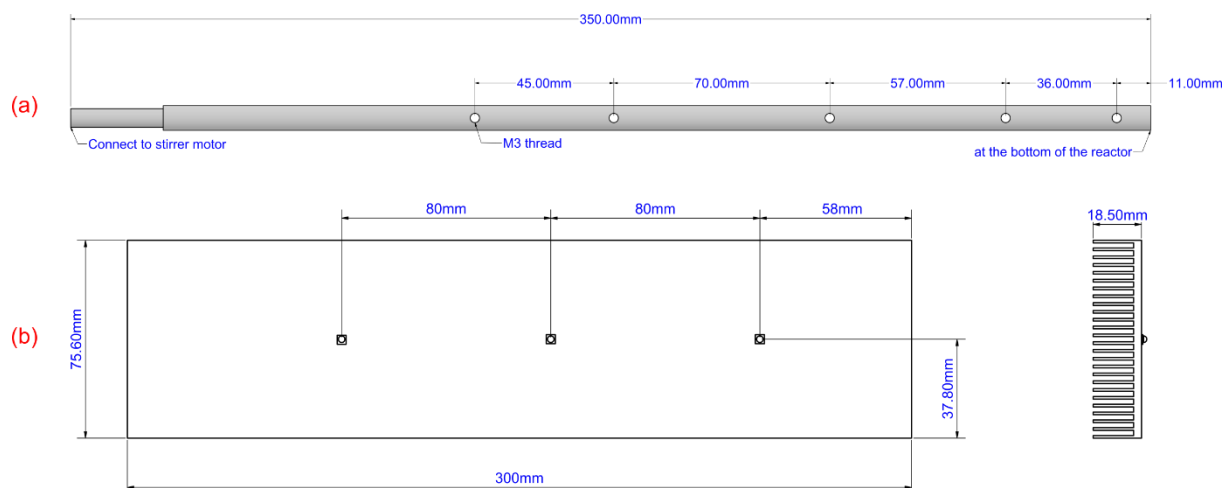

**Figure S2.** Geometry of (a) holes with M3 thread on shaft tube and (b) LEDs on heat sink.

**Table S1.** 3D printer setting for all 3D-printed parts.

| Parameters           | Magnitude | Unit |
|----------------------|-----------|------|
| layer thickness      | 0.2       | mm   |
| infill density (%)   | 15        | –    |
| bed temperature      | 60        | °C   |
| extruder temperature | 205       | °C   |

**Table S2.** Technical specification of used UV LED (Luminus SST-10-UV, Luminus Devices, Inc.).

| Parameter                | Symbol        | Values  | Unit    |
|--------------------------|---------------|---------|---------|
| peak wavelength range    | $\lambda$     | 365–375 | nm      |
| forward voltage          | $V_{Fmin}$    | 3.0     | V       |
|                          | $V_F$         | 3.7     | V       |
|                          | $V_{Fmax}$    | 4.0     | V       |
| radiometric flux         | $\Phi_{typ}$  | 875     | mW      |
| absolute Maximum current | $I_{max}$     | 1.0     | A       |
| viewing angle            | $2\phi_{1/2}$ | 130     | degrees |

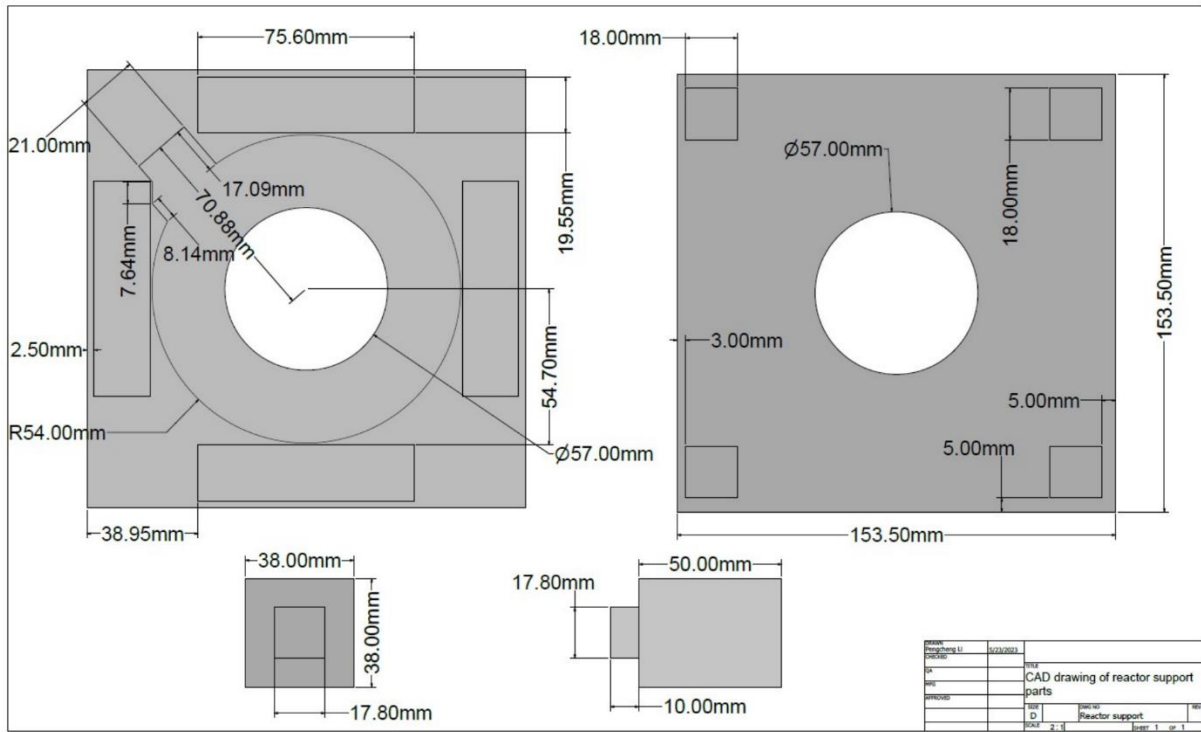

**Figure S3.** CAD drawing of reactor support parts.

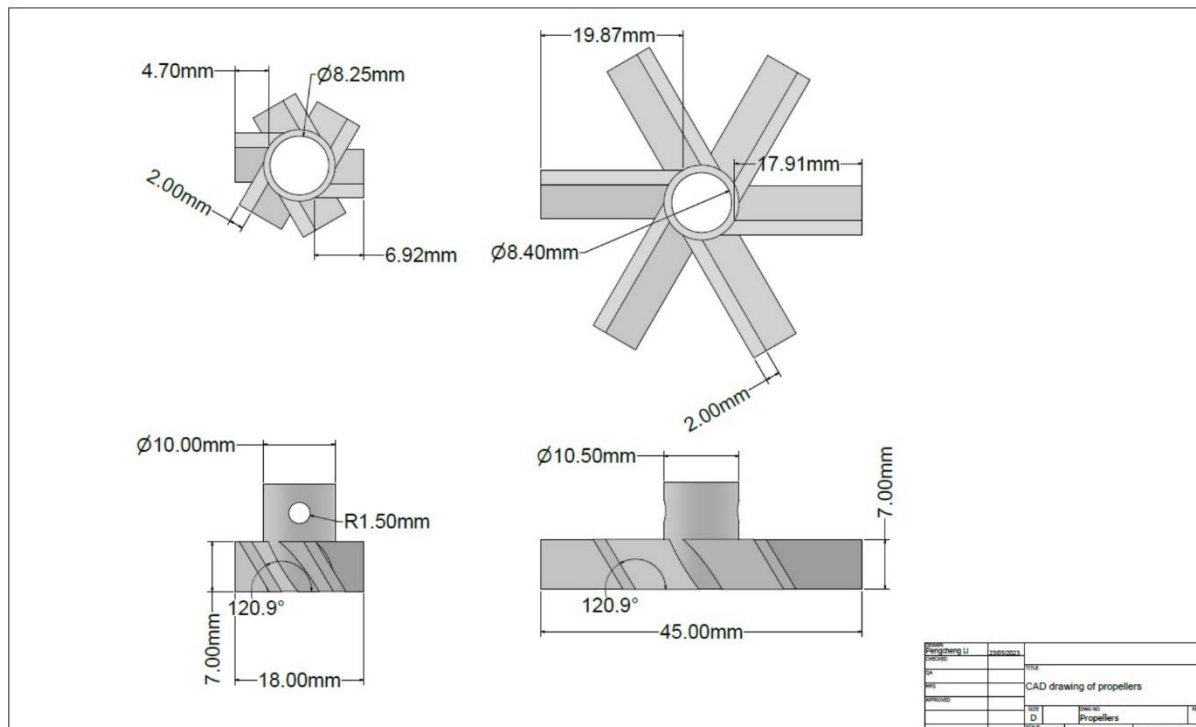

**Figure S4.** CAD drawing of designed propellers used for the experiments.

**Mixing time value calculation:**

To get the mixing time value, the difference of red channel values to the initial red channel value at the beginning of the experiment is calculated for different positions in the movie frames taken from the mixing experiments. Since the color tracer, a methylene blue solution, is blue and the reactor was illuminated with red light, the red channel value decreases in regions where the tracer is present. Therefore, the difference of red channel value would increase after the color tracer is injected. For each stirring speed, when the difference of red channel value is first larger than a threshold value (based on the red channel value plot), the corresponding time value is then extracted. For example, at stirring speed 430 rpm (Figure 4 in the publication), the difference of red channel values to the initial red channel value in the draft tube is calculated. After the color tracer is

injected at the top of the reactor, the difference increases. When the difference becomes larger than 4, it means the tracer is present. The time point when the difference first gets bigger than 4 is then extracted, which is at  $t = 1.36$  s. The difference increases before it becomes constant, which means the mixing in draft tube is complete. This threshold value is 181.4, which corresponds to the time at  $t = 4.08$  s. Then the mixing time in the draft tube at 430 rpm can be calculated, which is 2.72 s. The Python code for getting all mixing time is shown in Supporting Information File 3.

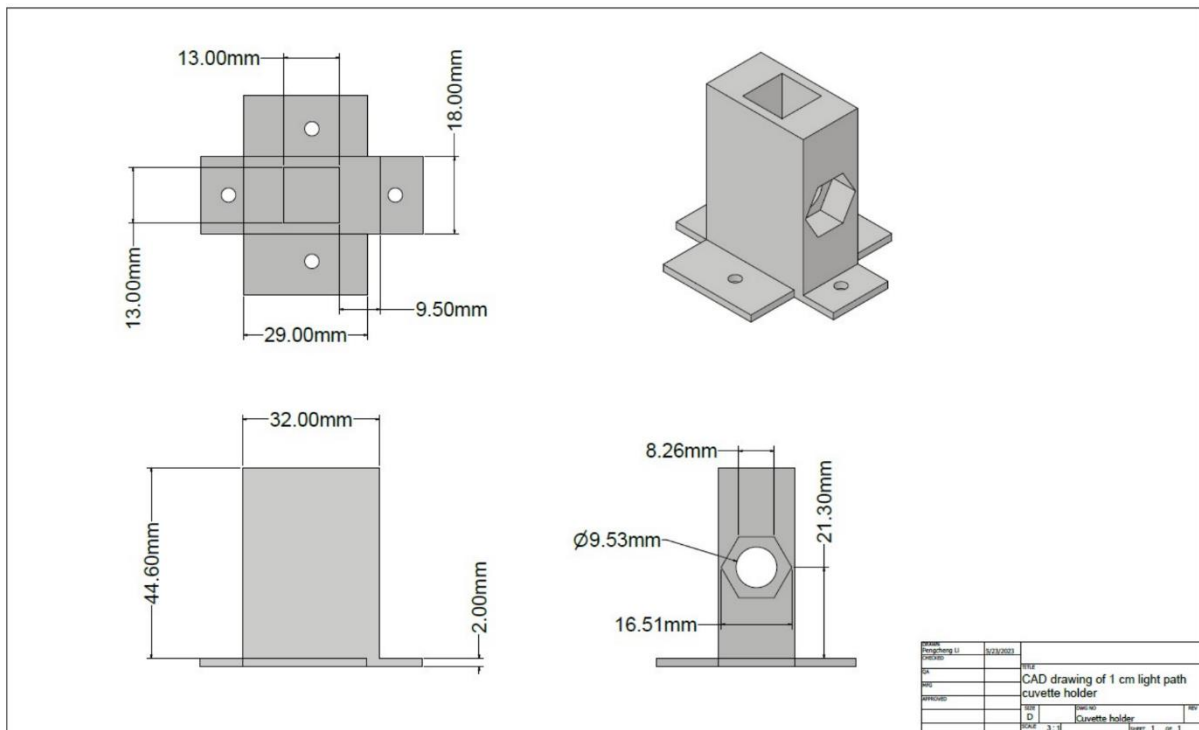

**Figure S5.** CAD drawing of 1 cm light path cuvette holder for absorption measurement.

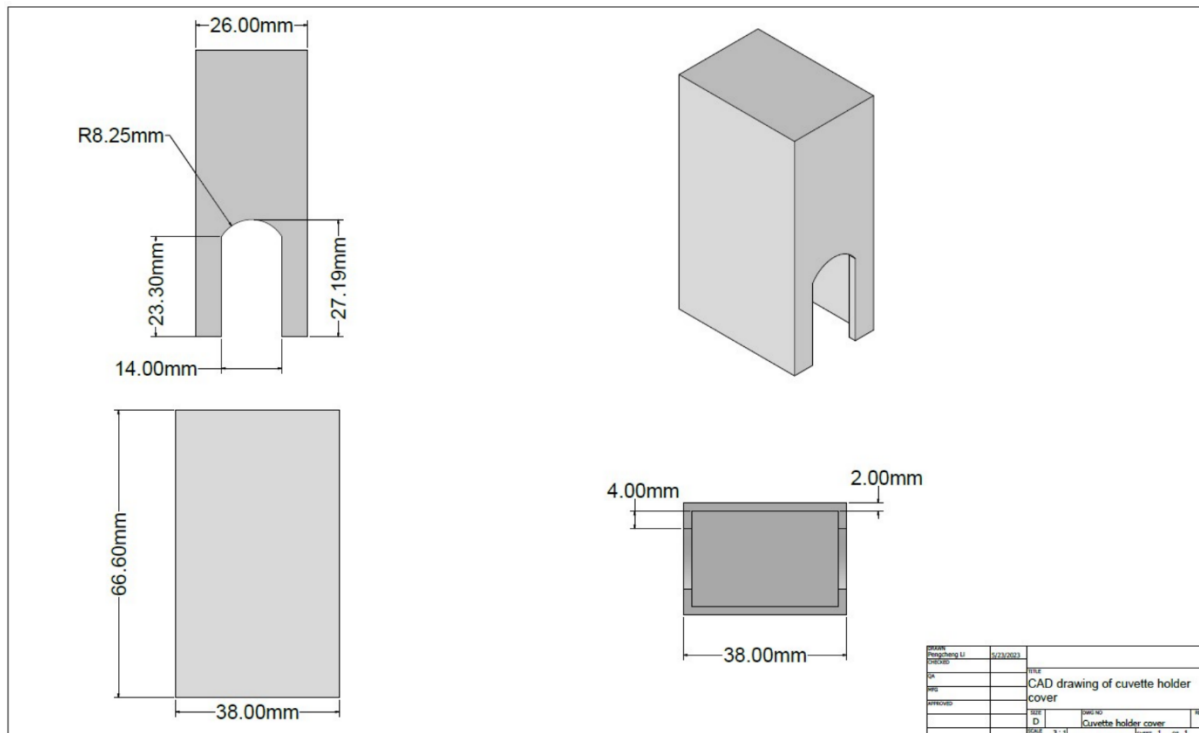

**Figure S6.** CAD drawing of 1 cm light patch cuvette holder cover.

The .stl files for reactor support, propellers, and all used holders can be found in Supporting Information File 4.

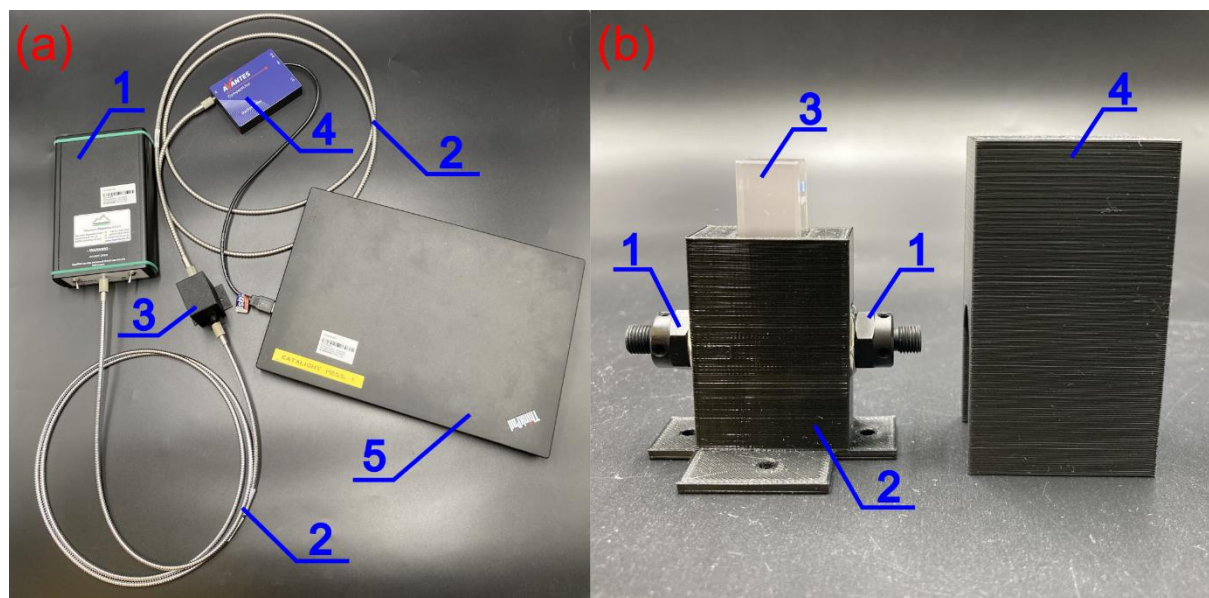

**Figure S7.** UV-vis absorption measurement setup: (a) whole absorption measurement setup: **1** light source, **2** optic fiber cable, **3** cuvette holder setup, **4** spectrometer, **5** computer; (b) cuvette holder and cuvette holder cover: **1** collimator, **2** cuvette holder, **3** cuvette, **4** cuvette holder cover.

**Adjustment factor for results using photocatalysts from different batches:**

Photocatalytic water reduction using photocatalysts from different batches was performed with the same operating condition ( $c = 0.22 \text{ g L}^{-1}$ ,  $r = 560 \text{ rpm}$ ,  $q = 4.70 \text{ } \mu\text{mol s}^{-1}$ ,  $\dot{V} = 50 \text{ ml min}^{-1}$ ). Figure S8 shows that the hydrogen generation rate follows a similar behavior for photocatalysts from different batches. An adjustment factor was determined by calculating the mean hydrogen generation ratio of the entire irradiation time, which was 2.212. After applying the adjustment factor, the same hydrogen generation rate values could be achieved. Therefore, this adjustment factor was used to align the results from the two batches used.



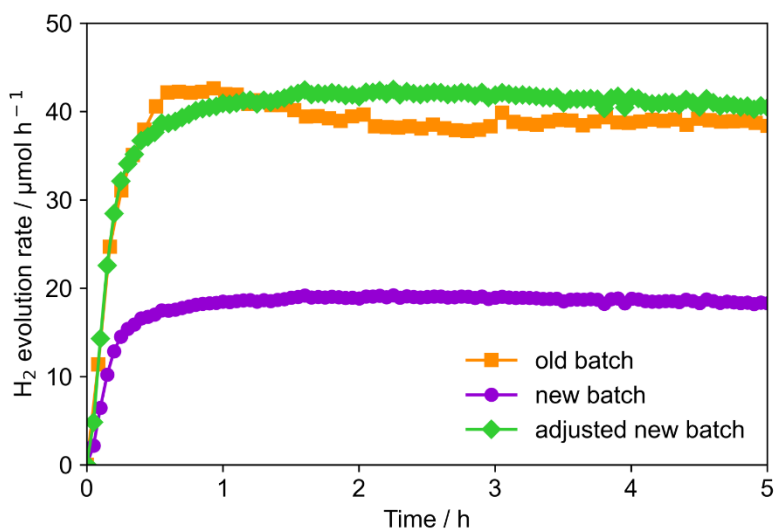

**Figure S8.** H<sub>2</sub> generation rate as a function of irradiation time using photocatalysts from different batches.

**Table S3.** Design of experiment with different combinations of parameters and their response values.

| Run # | Independent variables                |                                           |                      |                                            | Response                                                        |
|-------|--------------------------------------|-------------------------------------------|----------------------|--------------------------------------------|-----------------------------------------------------------------|
|       | Photon flux / $\mu\text{mol s}^{-1}$ | Photocatalyst loading / $\text{g L}^{-1}$ | Stirring speed / rpm | Inert gas flow rate / $\text{ml min}^{-1}$ | Maximum H <sub>2</sub> generation rate / $\mu\text{mol h}^{-1}$ |
| 1     | 0.82                                 | 0.22                                      | 860                  | 35                                         | 8.21                                                            |
| 2     | 4.70                                 | 0.11                                      | 560                  | 35                                         | 27.03                                                           |
| 3     | 0.82                                 | 0.11                                      | 860                  | 50                                         | 10.11                                                           |
| 4     | 6.37                                 | 0.33                                      | 560                  | 25                                         | 58.07                                                           |
| 5     | 8.19                                 | 0.33                                      | 860                  | 50                                         | 63.44                                                           |
| 6     | 2.60                                 | 0.33                                      | 740                  | 25                                         | 21.10                                                           |
| 7     | 2.60                                 | 0.22                                      | 740                  | 15                                         | 19.80                                                           |
| 8     | 6.37                                 | 0.22                                      | 430                  | 50                                         | 51.81                                                           |
| 9     | 8.19                                 | 0.43                                      | 560                  | 50                                         | 82.64                                                           |
| 10    | 4.70                                 | 0.11                                      | 740                  | 50                                         | 45.43                                                           |
| 11    | 2.60                                 | 0.22                                      | 860                  | 25                                         | 17.32                                                           |
| 12    | 6.37                                 | 0.65                                      | 560                  | 25                                         | 56.30                                                           |
| 13    | 4.70                                 | 0.11                                      | 860                  | 35                                         | 36.06                                                           |
| 14    | 6.37                                 | 0.33                                      | 430                  | 25                                         | 44.26                                                           |
| 15    | 4.70                                 | 0.43                                      | 740                  | 35                                         | 42.63                                                           |
| 16    | 4.70                                 | 0.22                                      | 560                  | 50                                         | 42.49                                                           |
| 17    | 0.82                                 | 0.11                                      | 740                  | 15                                         | 6.28                                                            |
| 18    | 0.82                                 | 0.65                                      | 430                  | 50                                         | 9.87                                                            |
| 19    | 8.19                                 | 0.65                                      | 430                  | 15                                         | 42.98                                                           |

|    |      |      |     |    |       |
|----|------|------|-----|----|-------|
| 20 | 8.19 | 0.22 | 740 | 15 | 44.46 |
| 21 | 6.37 | 0.11 | 560 | 35 | 35.50 |
| 22 | 2.60 | 0.43 | 430 | 15 | 21.06 |
| 23 | 8.19 | 0.11 | 860 | 15 | 37.63 |
| 24 | 2.60 | 0.33 | 430 | 25 | 19.82 |
| 25 | 0.82 | 0.43 | 740 | 35 | 11.24 |

---
